# Supplementary material for: 10 years of didactic training for novices in medical education at Charité
Source: PubMed Central journal article supplement (PMC5654120; doi:10.3205/zma001116), 2017-10-16
Supplement: JME-34-39-s-001.pdf [file JME-34-39-s-001.pdf]

**How long have you been teaching?**

- I have not yet taught
- 1-2 years
- 3-4 years
- More than 4 years

**In which kind of clinic or institute do you work?**

- Clinical
- Clinical, theoretical
- Basic medical science
- Other: \_\_\_\_\_

**In which teaching formats have you already taught?  
(more than one answer possible)**

- Small group (e.g. Communication course, PBL, bedside teaching)
- Middle sized groups (e.g. seminar)
- Large group (e.g. lecture)

**What motivated you to take part in this training course?  
(more than one answer possible)**

- Own interest
- Obligated to by teaching coordinator / supervisor
- Other: \_\_\_\_\_

**Please state to what extent you agree with the following:**

|                                                                                                 | Completely agree         | Agree                    | Partly agree             | Don't really agree       | Do not agree             |
|-------------------------------------------------------------------------------------------------|--------------------------|--------------------------|--------------------------|--------------------------|--------------------------|
| I learned new teaching methods which I can apply in my teaching sessions                        | <input type="checkbox"/> | <input type="checkbox"/> | <input type="checkbox"/> | <input type="checkbox"/> | <input type="checkbox"/> |
| The structure of the course made sense for me                                                   | <input type="checkbox"/> | <input type="checkbox"/> | <input type="checkbox"/> | <input type="checkbox"/> | <input type="checkbox"/> |
| I found the ratio of theory content to practical exercises appropriate                          | <input type="checkbox"/> | <input type="checkbox"/> | <input type="checkbox"/> | <input type="checkbox"/> | <input type="checkbox"/> |
| I feel well prepared for my teaching                                                            | <input type="checkbox"/> | <input type="checkbox"/> | <input type="checkbox"/> | <input type="checkbox"/> | <input type="checkbox"/> |
| I can prepare my teaching so that students benefit                                              | <input type="checkbox"/> | <input type="checkbox"/> | <input type="checkbox"/> | <input type="checkbox"/> | <input type="checkbox"/> |
| I have a good overview of the medical curriculum at the Charité                                 | <input type="checkbox"/> | <input type="checkbox"/> | <input type="checkbox"/> | <input type="checkbox"/> | <input type="checkbox"/> |
| The materials and media used in the course helped me understand the topics                      | <input type="checkbox"/> | <input type="checkbox"/> | <input type="checkbox"/> | <input type="checkbox"/> | <input type="checkbox"/> |
| I would recommend this course to my colleagues                                                  | <input type="checkbox"/> | <input type="checkbox"/> | <input type="checkbox"/> | <input type="checkbox"/> | <input type="checkbox"/> |
| I am generally very satisfied with the course                                                   | <input type="checkbox"/> | <input type="checkbox"/> | <input type="checkbox"/> | <input type="checkbox"/> | <input type="checkbox"/> |
| I would like to spend more of my working time on teaching (including preparation and follow-up) | <input type="checkbox"/> | <input type="checkbox"/> | <input type="checkbox"/> | <input type="checkbox"/> | <input type="checkbox"/> |

|                                | Much too long            | Too long                 | Appropriate              | Too short                | Much too short           |
|--------------------------------|--------------------------|--------------------------|--------------------------|--------------------------|--------------------------|
| The duration of the course was | <input type="checkbox"/> | <input type="checkbox"/> | <input type="checkbox"/> | <input type="checkbox"/> | <input type="checkbox"/> |

**What did you especially like about the course?**

**What would you do differently if you were teaching this course?**

**Would you like to take part in more faculty development courses? If so, on what topics?**

**Thank you!**
